# Supplementary material
Source: publisher figshare collection journal article supplement (https://frontiersin.figshare.com/ndownloader/files/12299849)
Supplement: Supplementary file [file 12299849]

# YYIR1

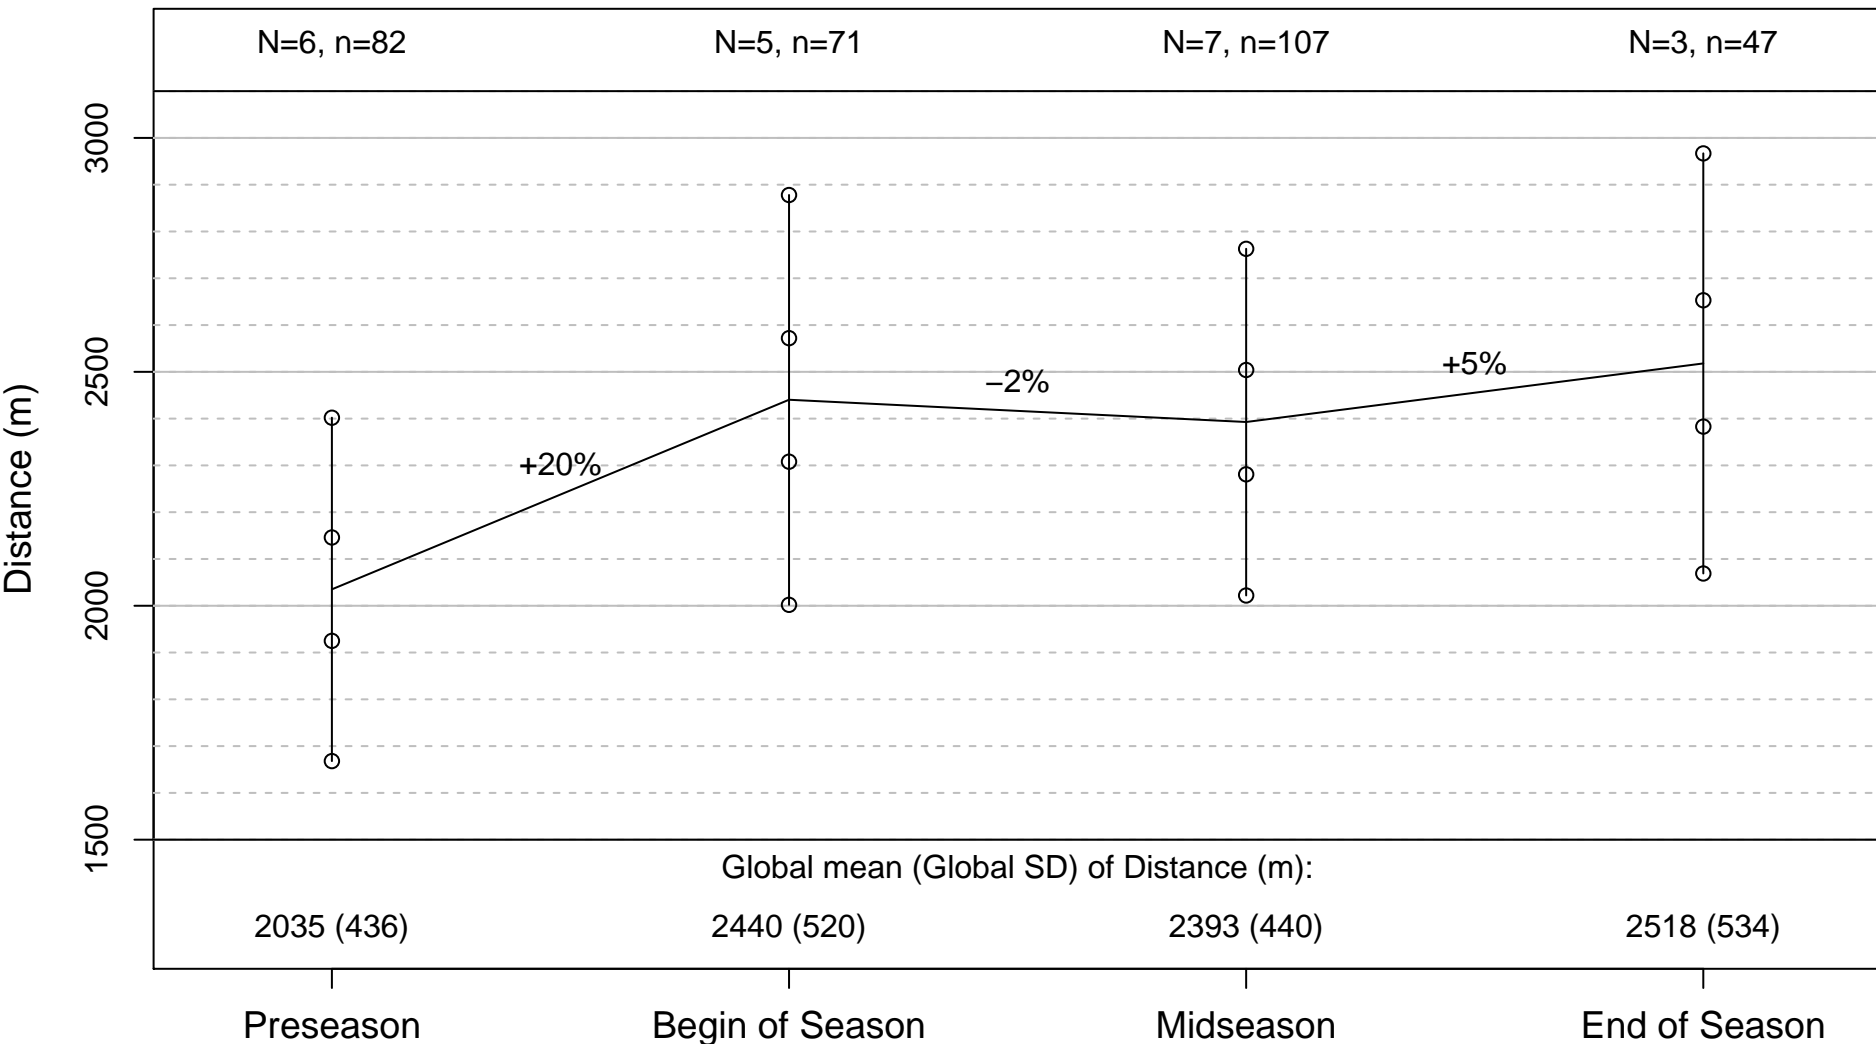

**Supplementary Figure 4:** YYI results by player position and intra-seasonal differences.
